# Supplementary material for: Immune cell counts and signaling in body fluids of cows vaccinated against Clostridium difficile
Source: J Biol Res (Thessalon). 2018 Dec 10;25:20. doi: 10.1186/s40709-018-0092-4 (PMC6288880; doi:10.1186/s40709-018-0092-4)
Supplement: Supplementary file 3 — Additional file 3: Table S3. ΔΔCq changes in gene expression of SC relative to TW 1 or rather TW 15. [file 40709_2018_92_MOESM3_ESM.xlsx]

## Sheet: Additional file 3
	Additional file 3
	Immune cell counts and signaling in body fluids of cows vaccinated against Clostridium difficile.
	Christiane Schmautz1, Nadine Müller1, Marlene Auer1, Ines Ballweg1, Michael W. Pfaffl1 and Heike Kliem1*
	1 Chair of Animal Physiology and Immunology, Technical University of Munich (TUM), Weihenstephaner Berg 3, 85354 Freising, Germany
	* Corresponding author				E-mail: heike.kliem@wzw.tum.de
	Table S3. DDCq changes in gene expression of SC1 relative to TW 1 or rather TW 15.
				TW2	1			3			4			5			6			7			8			9			11			13			15			17			19			21			23
				IM3	N			N - PC						N						N						N			N			N			N			N - PC			N			N - PC - SC			N
	Affiliation	Gene	Regulation	Group	LSM4	SD	P<0.05	LSM	SD	P<0.05	LSM	SD	P<0.05	LSM	SD	P<0.05	LSM	SD	P<0.05	LSM	SD	P<0.05	LSM	SD	P<0.05	LSM	SD	P<0.05	LSM	SD	P<0.05	LSM	SD	P<0.05	LSM	SD	P<0.05	LSM	SD	P<0.05	LSM	SD	P<0.05	LSM	SD	P<0.05	LSM	SD	P<0.05
	bMEC8			Ctr5	0	0.5737		-0.5193	0.5737		-0.2763	0.5737		-0.5035	0.5737		-1.0963	0.5737		-1.525	0.5737	a	-1.615	0.5737	a *	-0.0863	0.5737		-1.181	0.5132		-1.2118	0.5737	a	0	0.5132		-0.2244	0.5132		-0.3598	0.5132	a	0.1927	0.6625		-0.1798	0.5132
	related	KRT8	+	LR6	0.0003	0.6625		0.4933	0.6625		0.28	1.1475		0.2882	0.5737		0.61	0.8114		0.2843	0.6625	b	0.0082	0.5737	b	0.4132	0.5737		0.2582	0.5737		1.2577	0.5737	b	0	0.5737		-1.135	0.5737		1.185	0.5737	b	0.52	0.5737		1.02	0.5737
	genes			HR7	0	0.5737		0.265	0.5737		-0.1567	0.6625		0.1625	0.5737		0.245	0.8114		0.0225	0.5737	ab	-0.246	0.5132	ab	0.378	0.5132		0.06	0.6625		0.74	0.5737	b	0	0.5132		-0.256	0.5132		-0.216	0.5132	ab	0.52	0.5132		0.264	0.5132
				Ctr	0.0033	1.4844		-1.74	1.2855		-0.172	1.1498		-1.112	1.1498		-2.44	1.2855	a	0.6175	1.2855		1.685	1.2855		0.215	1.2855		1.136	1.1498		0.19	1.1498		0.002	1.1498		-1.656	1.1498	a	0.148	1.1498		1.565	1.2855		0.604	1.1498
		PIGR+	++	LR	0	1.4844		0.4667	1.4844		-0.13	2.5711		1.5375	1.2855		2.905	1.818	b	2.7167	1.4844		0.31	1.2855		1.095	1.2855		1.2233	1.4844		-0.9875	1.2855		0	1.2855		0.6475	1.2855	ab	1.5775	1.2855		2.8725	1.2855		1.975	1.2855
				HR	0.0025	1.2855		0.615	1.2855		0.2333	1.4844		1.5525	1.2855		0.43	1.818	ab	0.67	1.2855		-0.072	1.1498		-1.798	1.1498		-0.432	1.1498		-1.96	1.2855		0.002	1.1498		2.208	1.1498	b	0.886	1.1498		3.342	1.1498	*	2.806	1.1498
				Ctr	0	0.7617		-0.74	0.6597		-0.7475	0.6597		-0.736	0.59		-1.3075	0.6597		-0.8075	0.6597		-0.4025	0.6597		0.1525	0.6597		-0.062	0.59		0.2675	0.6597		-0.002	0.59		0.1675	0.6597		0.088	0.59		0.5625	0.6597		-0.05	0.59
		FcRN+	0	LR	0	0.7617		-0.5667	0.7617		-0.68	1.3194		-1.155	0.6597		-1.24	0.9329		-1.2	0.7617		-0.83	0.6597		-0.2175	0.6597		0.2333	0.7617		0	0.6597		0	0.6597		1.3975	0.6597		1.0025	0.6597		1.0975	0.6597		0.975	0.6597
				HR	0	0.6597		0.1775	0.6597		0.4	0.7617		-1.0875	0.6597		-0.07	0.9329		-1.045	0.6597		-0.644	0.59		-0.232	0.59		0.656	0.59		0.45	0.6597		0.002	0.59		0.228	0.59		0.646	0.59		0.142	0.59		0.186	0.59
				Ctr	0.0002	0.8615		0.316	0.8615		0.172	0.9947		-0.894	0.8615		0.7992	0.8615		0.5292	0.8615		0.4792	0.8615		0.9655	0.8615		0.226	0.7705		0.2282	0.8615		0	0.7705		-0.1288	0.8615		-0.1058	0.7705		-1.488	0.9947		-0.5956	0.7705
		C1QA+	0	LR	0	0.9947		-0.5887	0.9947		-0.767	1.723		-0.918	0.8615		-1.142	1.2183		-0.0077	0.9947		0.5873	0.9947		1.161	0.8615		0.407	0.8615		-0.6158	0.8615		0	0.8615		0.4792	0.8615		-0.0625	0.8615		-0.2918	0.8615		0.3	0.8615
				HR	0.0002	0.8615		0.3085	0.8615		0.5693	0.9947		-1.899	0.8615		-1.096	1.2183		0.1345	0.8615		0.3474	0.7705		0.9076	0.7705		0.1373	0.9947		-0.1508	0.8615		0	0.7705		-0.3932	0.7705		0.18	0.7705		0.4734	0.7705		0.2	0.7705
				Ctr	0.0003	0.4977		-0.0965	0.4977		0.0698	0.4977		-0.119	0.4977	a	-0.3132	0.4977		-0.0207	0.4977		0.6043	0.4977	a	0.003	0.4977		0.376	0.4452		0.9948	0.4977		0	0.4452		0.5502	0.4452		0.1876	0.4452		0.9897	0.5747		0.6778	0.4452
		C3+	+	LR	0	0.5747		-0.1553	0.5747		0.333	0.9955		1.607	0.4977	b *	1.158	0.7039		1.259	0.5747		0.5988	0.4977	a	-0.139	0.4977		0.132	0.4977		0.101	0.4977		0	0.4977		-0.0457	0.4977		-0.5125	0.4977		0.3083	0.4977		0.7	0.4977
				HR	0	0.4977		0.6447	0.5747		0.2027	0.5747		1.123	0.4977	ab	0.854	0.7039		0.1062	0.4977		-0.835	0.4452	b	-0.635	0.4452		0.1	0.5747		-0.3125	0.4977		0	0.4452		0.1468	0.4452		0.16	0.4452		1.0934	0.4452		1.06	0.4452
				Ctr	0	0.8085		-0.1	0.7001		0.244	0.6262		1.2175	0.7001	a	1.1225	0.7001		-0.6	0.8085		-0.37	0.7001		0.495	0.7001		0.02	0.6262		0.612	0.6262		0.002	0.6262		-0.03	0.6262		-0.142	0.6262		-0.8725	0.7001		-0.196	0.6262
		CCL5+	+	LR	0	0.8085		-0.2433	0.8085		1.57	1.4003		0.3775	0.7001	ab	1.095	0.9902		0.4633	0.8085		0.5025	0.7001		1.08	0.7001		1.6433	0.8085		1.245	0.7001		0	0.7001		0.8475	0.7001		0.5525	0.7001		-0.4775	0.7001		-0.425	0.7001
				HR	0.0025	0.7001		-1.585	0.7001		-0.9667	0.8085		-0.9975	0.7001	b	-0.17	0.9902		-0.23	0.7001		0.328	0.6262		0.662	0.6262		0.148	0.6262		0.965	0.7001		0.002	0.6262		-0.312	0.6262		-0.314	0.6262		-1.658	0.6262		-1.234	0.6262
				Ctr	0	1.0504		2.365	0.9097	a	-0.9075	0.9097		-0.24	0.8137		-0.07	0.9097		-2.395	0.9097		-1.2475	0.9097		-2.955	0.9097	a *	-1.85	0.8137		-2.205	0.9097		0	0.8137		0.6175	0.9097	a	1.248	0.8137	a	2.0875	0.9097	a	2.318	0.8137	a *
		CCL20+	++	LR	-0.0033	1.0504		-0.18	1.0504	ab	1.47	1.8194		-0.5225	0.9097		-1.665	1.2865		-3.12	1.0504	*	-1.495	0.9097		-0.51	0.9097	ab	-2.02	1.0504		-0.9675	0.9097		0	0.9097		-0.0275	0.9097	ab	-0.2975	0.9097	ab	-0.6525	0.9097	b	-2.475	0.9097	b
				HR	-0.0025	0.9097		-0.31	0.9097	b	0.0167	1.0504		-1.3775	0.9097		1.355	1.2865		-1.285	0.9097		-0.756	0.8137		-0.464	0.8137	b	-1.178	0.8137		-1.6775	0.9097		0.002	0.8137		-2.392	0.8137	b *	-1.674	0.8137	b	-2.278	0.8137	b *	-2.274	0.8137	b *
				Ctr	0	1.0714		-0.5125	0.9279		-1.078	0.8299		-1.626	0.8299	a	-0.9425	0.9279	a	-1.9625	0.9279	a	-1.5575	0.9279		-2.445	0.9279	a	-1.612	0.8299	a	-1.74	0.8299	a	-0.002	0.8299		0.592	0.8299		-0.612	0.8299		0.9375	0.9279		-0.01	0.8299
		CCL28+	+	LR	0	1.0714		0.85	1.0714		-0.23	1.8557		2.47	0.9279	b	2.485	1.3122	b	2.4	1.0714	b	0.8075	0.9279		1.3075	0.9279	b	1.5667	1.0714	b	1.075	0.9279	b	0	0.9279		-0.1025	0.9279		0.7525	0.9279		1.7975	0.9279		0.9	0.9279
				HR	-0.0025	0.9279		0.565	0.9279		0.7833	1.0714		1.485	0.9279	b	1.855	1.3122	ab	0.3775	0.9279	ab	-0.606	0.8299		-1.394	0.8299	a	-0.128	0.8299	ab	-0.79	0.9279	ab	0.002	0.8299		0.948	0.8299		-0.174	0.8299		2.102	0.8299		1.586	0.8299
				Ctr	-0.0033	0.8268		-0.7075	0.716		-1.236	0.6404		-0.714	0.6404		-0.7325	0.716		-1.39	0.716		-0.2725	0.716		-1.165	0.716		-0.678	0.6404		-0.344	0.6404		0.002	0.6404		0.704	0.6404		0.548	0.6404	a	0.865	0.716	a	1.164	0.6404	a
		CXCL3+	+	LR	0	0.8268		0.2833	0.8268		-0.73	1.4321		-0.475	0.716		-0.77	1.0126		-1.1833	0.8268		-0.9525	0.716		0.045	0.716		0.44	0.8268		0.9125	0.716		0	0.716		-0.3275	0.716		-1.4975	0.716	b	-0.6525	0.716	ab	-1.275	0.716	b
				HR	0	0.716		0.7775	0.716		-0.9833	0.8268		-1.0075	0.716		1.055	1.0126		-0.89	0.716		0.04	0.6404		0.214	0.6404		0.68	0.6404		-0.205	0.716		0.002	0.6404		-1.932	0.6404	*	-1.994	0.6404	b *	-1.918	0.6404	b *	-1.554	0.6404	b
				Ctr	0	1.1453		-0.255	0.9918		-0.392	0.8871		-0.11	0.8871		0.865	0.9918		0.02	0.9918		-0.6625	0.9918		-0.4275	0.9918		0.356	0.8871		0.52	0.8871		0.002	0.8871		-0.4	0.8871		-0.642	0.8871		-1.2975	0.9918		0.084	0.8871
		CXCL5+	0	LR	0	1.1453		1.2667	1.1453		0.72	1.9837		-1.01	0.9918		-0.595	1.4027		-0.1267	1.1453		0.29	0.9918		1.3875	0.9918		1.53	1.1453		2.18	0.9918		0	0.9918		0.5475	0.9918		-0.3475	0.9918		-0.6525	0.9918		-0.75	0.9918
				HR	-0.0025	0.9918		-0.585	0.9918		-0.2333	1.1453		-1.5275	0.9918		0.63	1.4027		-0.56	0.9918		0.304	0.8871		0.936	0.8871		1.162	0.8871		1.035	0.9918		0.002	0.8871		-0.552	0.8871		-0.934	0.8871		-1.318	0.8871		-1.574	0.8871
				Ctr	0	1.2885		-0.415	1.1159		-0.698	0.9981		-0.09	0.9981		1.255	1.1159		0.9175	1.1159		-0.0275	1.1159		-0.5225	1.1159		0.258	0.9981		0.25	0.9981		-0.002	0.9981		0.072	0.9981		-0.012	0.9981		-0.9125	1.1159		1.15	0.9981	a
		CXCL8+	+	LR	0	1.2885		0.9167	1.2885		-0.68	2.2317		-2.155	1.1159		-0.815	1.5781		-1.5667	1.2885		-0.1675	1.1159		1.2075	1.1159		0.65	1.2885		1.95	1.1159		0	1.1159		-0.1525	1.1159		-1.3975	1.1159		-1.1525	1.1159		-2.125	1.1159	b
				HR	0.0025	1.1159		0.765	1.1159		-0.9667	1.2885		-0.76	1.1159		2.28	1.5781		0.0825	1.1159		1.418	0.9981		2.232	0.9981		2.478	0.9981		2.4025	1.1159		0.002	0.9981		-1.252	0.9981		-1.354	0.9981		-1.658	0.9981		-1.894	0.9981	b
				Ctr	0	1.3687		-0.5125	1.1853		0.662	1.0602		-1.438	1.0602	a	-1.6225	1.1853	a	-0.9125	1.1853		-0.63	1.1853		-1.345	1.1853		-0.64	1.0602		-0.866	1.0602		0	1.1853		-0.8533	1.3687		-1.685	1.1853		-0.66	1.3687		-1.036	1.0602
		LPO+	++	LR	0	1.3687		1.6667	1.3687		0.22	2.3707		2.2325	1.1853	b	3.405	1.6763	b	2.26	1.3687		0.8325	1.1853		1.1275	1.1853		1.3333	1.3687		0.5475	1.1853		0	1.1853		0.3475	1.1853		0.9025	1.1853		2.3225	1.1853		1.5	1.1853
				HR	0.0025	1.1853		2.39	1.1853		0.8667	1.3687		1.815	1.1853	b	1.53	1.6763	ab	0.4825	1.1853		-0.242	1.0602		-1.508	1.0602		-0.002	1.0602		-0.8725	1.1853		0.002	1.0602		0.788	1.0602		-0.414	1.0602		1.982	1.0602		1.686	1.0602
				Ctr	0.0003	0.7915		-0.834	0.7915		-0.8427	0.7915		-0.919	0.7915	a	-1.2507	0.7915	a	-0.4957	0.7915	a	-0.2707	0.7915	ab	-0.5845	0.7915	ab	-0.054	0.708		-0.3387	0.7915	a	-0.0002	0.708		-0.503	0.708	a	-1.019	0.708		0.2677	0.914	a	-0.2088	0.708	a
		LF+	+	LR	0.0003	0.914		1.2113	0.914		0.733	1.583		1.9738	0.7915	b	2.108	1.1194	b	2.048	0.914	b	1.476	0.914	a	1.0778	0.7915	a	1.737	0.914		-0.1075	0.7915	a	0	0.7915		1.0293	0.7915	ab	1.1375	0.7915		2.8083	0.7915	b *	2.4	0.7915	b *
				HR	0	0.914		0.5853	0.914		0.577	0.914		0.105	0.7915	ab	-0.085	1.1194	ab	-0.8365	0.7915	a	-1.6894	0.708	b	-1.4294	0.708	b	-0.7103	0.914		-2.5953	0.7915	b *	0	0.708		1.5268	0.708	b	0.54	0.708		2.8134	0.708	b *	1.72	0.708	ab
				Ctr	0	0.9022		-1.655	0.7366		-2.8557	0.7366	*	-2.888	0.9022	*	-2.029	0.638		-2.8668	0.638	*	-2.9415	0.638	*	-1.217	0.9022		-2	0.638		-1.0513	0.638		0	0.638		-1.115	1.2759		-1.0328	0.638		-0.5437	0.7366		-0.2648	0.638
		LYZ1+	+	LR	0	0.9022		0.1085	0.9022		NN9			-0.925	0.7366		-2.321	0.9022		-1.175	1.2759		-2.3545	0.9022		-0.9125	0.9022		-1.129	0.9022		-1.412	0.7366		0	0.638		1.092	0.9022		-0.0723	0.7366		-1.1167	0.638		0.725	0.9022
				HR	0	0.638		-0.7165	0.9022		-0.675	0.9022		-1.904	0.9022		-0.317	0.9022		-1.0913	0.7366		-1.6754	0.5706		-1.24	0.638		-2.271	0.9022	*	-1.515	0.7366		0	0.638		-0.6482	0.5706		-0.5605	0.638		-1.0616	0.5706		-0.2168	0.638
				Ctr	0.0003	0.7911		1.6473	0.7911	a	0.7135	0.7911		1.9637	0.9135	a	0.8805	0.7911	a	0.2543	0.7911		0.4293	0.7911		1.8968	0.7911		1.091	0.7076		1.5033	0.7911		0	0.7076		-0.3037	0.7911		-0.2258	0.7076		-0.188	0.9135		-0.4756	0.7076
		TAP+	+	LR	0	0.9135		-1.522	0.9135	b	-1.667	1.5823		-0.993	0.7911	b	-0.842	1.1188	ab	-0.141	0.9135		-0.7013	0.7911		0.211	0.7911		-0.043	0.7911		1.4053	0.9135		0	0.7911		1.1543	0.7911		0.3375	0.7911		-0.4167	0.7911		1.1277	0.9135
				HR	0	0.7911		-2.079	0.7911	b	-0.9473	0.9135		-2.1833	0.7911	b	-2.321	1.1188	b	-0.925	0.7911		-0.78	0.7076		0.34	0.7076		-0.8917	0.9135		0.3017	0.9135		0	0.7076		-0.4532	0.7076		0.1	0.7076		-0.7866	0.7076		0.26	0.7076
	Phagocytes			Ctr	0	0.9913		-0.5175	0.8585		-0.502	0.7679		-0.144	0.7679		0.165	0.8585		-0.7425	0.8585		-0.94	0.8585		-1.395	0.8585	a	-1.514	0.7679	a	-1.486	0.7679	a	0.002	0.7679		0.512	0.7679		0.944	0.7679		1.0025	0.8585		1.088	0.7679
	related	C3AR1	+	LR	0.0033	0.9913		0.3133	0.9913		0.22	1.717		-0.56	0.8585		-0.295	1.2141		0.39	0.9913		0.6525	0.8585		0.91	0.8585	ab	0.0633	0.9913	ab	2.0375	0.8585	b	0	0.8585		0.22	0.8585		-0.245	0.8585		-0.735	0.8585		-0.2525	0.8585
	genes			HR	0.0025	0.8585		0.4625	0.8585		0.4567	0.9913		-0.865	0.8585		0.685	1.2141		0.39	0.8585		1.162	0.7679		1.282	0.7679	b	1.47	0.7679	b	2.0275	0.8585	b	0.002	0.7679		-0.782	0.7679		0.054	0.7679		-0.628	0.7679		-0.89	0.7679
				Ctr	-0.0033	1.136		-0.02	0.9838		0.444	0.8799		0.104	0.8799		1.5375	0.9838		1.695	0.9838		0.645	0.9838		0.335	0.9838		0.844	0.8799		0.31	0.8799	a	0	0.8799		-0.016	0.8799		0.332	0.8799		-0.61	0.9838		0.836	0.8799
		C5AR1	++	LR	0	1.136		1.7733	1.136		1.97	1.9676		-0.64	0.9838		0.945	1.3913		0.84	1.136		1.5325	0.9838		2.37	0.9838		2.3833	1.136		2.9725	0.9838	b *	0.0025	0.9838		-0.755	0.9838		-1.37	0.9838		-1.185	0.9838		-1.2775	0.9838
				HR	-0.0025	0.9838		0.8875	0.9838		0.4233	1.136		-0.135	0.9838		1.435	1.3913		1.0225	0.9838		2.466	0.8799		2.348	0.8799		3.254	0.8799	*	3.6075	0.9838	b *	0.002	0.8799		-0.802	0.8799		-0.646	0.8799		-0.908	0.8799		-1.55	0.8799
				Ctr	0	1.1164		-0.45	0.9668		-0.03	0.8648		-0.088	0.8648		1.335	0.9668		1.635	0.9668		0.575	0.9668		0.145	0.9668		0.65	0.8648		0.206	0.8648	a	0	0.8648		0.144	0.8648		0.672	0.8648		-0.66	0.9668		1.536	0.8648	a
		CXCR2	+	LR	0	1.1164		1.35	1.1164		0.02	1.9337		-1.755	0.9668		-0.54	1.3673		-0.4033	1.1164		1.4425	0.9668		2.1125	0.9668		1.63	1.1164		1.6875	0.9668	ab	0.0025	0.9668		0.195	0.9668		-0.47	0.9668		-0.71	0.9668		-1.3525	0.9668	b
				HR	0.0025	0.9668		-0.3875	0.9668		-1.26	1.1164		-0.9525	0.9668		1.31	1.3673		0.7525	0.9668		2.092	0.8648		2.612	0.8648	*	2.72	0.8648	*	2.8775	0.9668	b *	0.002	0.8648		-0.022	0.8648		-0.126	0.8648		-0.948	0.8648		-1.69	0.8648	b
				Ctr	0	0.7811		-0.7	0.6764		-0.602	0.605		-0.182	0.605		-0.65	0.7811		-0.175	0.6764		0.1525	0.6764		-0.2475	0.6764	a	-0.7725	0.6764	a	0.304	0.605		0	0.605		1.002	0.605		0.582	0.605		0.6775	0.6764		1.556	0.605	a
		TLR2	+	LR	0	0.7811		-0.5433	0.7811		1.12	1.3528		-0.94	0.6764		-0.48	0.9566		-0.4267	0.7811		0.22	0.6764		0.52	0.6764	ab	-0.7	0.7811	a	0.7225	0.6764		0.0025	0.6764		0.145	0.6764		-0.42	0.6764		-0.56	0.6764		-0.5525	0.6764	b
				HR	-0.0025	0.6764		1.1375	0.6764		0.7067	0.7811		0.1275	0.6764		1.11	0.9566		0.785	0.6764		1.856	0.605	*	1.558	0.605	b	1.564	0.605	b	1.6325	0.6764		0.002	0.605		-0.622	0.605		0.034	0.605		-0.408	0.605		-0.57	0.605	b
				Ctr	0	1.1253		-0.44	0.9745		-0.242	0.8716		-0.434	0.8716		0.5125	0.9745		-0.2825	0.9745		-0.1625	0.9745		0.115	0.9745		-0.254	0.8716		0.334	0.8716		0.002	0.8716		0.006	0.8716		0.314	0.8716		0.015	0.9745		0.228	0.8716
		CD163	0	LR	0	1.1253		1.3967	1.1253		2.67	1.949		-0.9225	0.9745		-0.82	1.3782		0.4367	1.1253		0.535	0.9745		0.7175	0.9745		-0.7767	1.1253		0.695	0.9745		0	0.9745		0.345	0.9745		-0.52	0.9745		0.065	0.9745		0.2725	0.9745
				HR	0.0025	0.9745		0.675	0.9745		-0.51	1.1253		-2.12	0.9745		-2.815	1.3782		-1.6625	0.9745		-0.44	0.8716		-0.16	0.8716		0.348	0.8716		0.0475	0.9745		0.002	0.8716		-0.342	0.8716		0.214	0.8716		0.092	0.8716		-0.17	0.8716
				Ctr	0	0.8968		0.4475	0.7766		-0.102	0.6946		-0.17	0.6946	a	0.7675	0.7766		-0.7475	0.7766		-1.1075	0.7766		-1.7075	0.7766		-2.024	0.6946		-1.648	0.6946		0	0.6946		1.044	0.6946	a	0.552	0.6946	a	1.765	0.7766	a	2.336	0.6946	a *
		TNFa	++	LR	0.0033	0.8968		-0.15	0.8968		0.97	1.5532		-1.45	0.7766	ab	-0.49	1.0983		-1.3167	0.8968		-1.6175	0.7766		0.33	0.7766		-1.7467	0.8968		-1.845	0.7766		0	0.7766		-0.055	0.7766	ab	-1.32	0.7766	ab	-2.06	0.7766	b	-1.5275	0.7766	b
				HR	0	0.7766		-0.325	0.7766		-2.2933	0.8968		-2.45	0.7766	b *	-1.54	1.0983		-2.045	0.7766		-0.966	0.6946		0.194	0.6946		-1.538	0.6946		-2.645	0.7766	*	0.002	0.6946		-1.462	0.6946	b	-1.646	0.6946	b	-2.428	0.6946	b *	-2.03	0.6946	b *
				Ctr	0	1.2029		-0.04	1.0417		-0.022	0.9318		0.368	0.9318	a	1.6425	1.0417		0.915	1.0417		0.255	1.0417		0.2675	1.0417		0.666	0.9318		0.712	0.9318		0	0.9318		-0.276	0.9318		-0.148	0.9318		-0.485	1.0417		1.436	0.9318	a
		IL1b	+	LR	0	1.2029		0.6233	1.2029		2.05	2.0835		-2.4275	1.0417	b	0.32	1.4733		-1.0933	1.2029		0.0325	1.0417		1.72	1.0417		1.5333	1.2029		2.2225	1.0417		0.0025	1.0417		0.095	1.0417		-0.62	1.0417		-0.935	1.0417		-1.5025	1.0417	b
				HR	0.0025	1.0417		0.0125	1.0417		-2.4767	1.2029		-1.165	1.0417	ab	0.385	1.4733		-0.76	1.0417		0.462	0.9318		1.322	0.9318		1.75	0.9318		1.9525	1.0417		0.002	0.9318		-1.222	0.9318		-0.606	0.9318		-1.488	0.9318		-1.97	0.9318	b
				Ctr	0	0.9884		0.615	0.856		-0.205	0.856		-0.57	0.856	ab	1.84	0.9884		-1.94	0.856		-1.61	0.856		-0.005	0.856		-1.686	0.7656		-2.61	0.856	a *	0	0.7656		-0.162	0.7656		0.022	0.7656		0.5275	0.856	a	0.896	0.7656	a
		IL6	+	LR	0	0.9884		1.29	0.9884		-1.42	1.7119		0.3175	0.856	a	0.52	1.2105		0.0533	0.9884		-1.685	0.856		0.5775	0.856		-0.0733	0.9884		-0.095	0.856	b	0	0.856		-0.255	0.856		-1.445	0.856		-2.21	0.856	b	-1.8775	0.856	b
				HR	0.0025	0.856		0.725	0.856		-0.5933	0.9884		-2.47	0.856	b *	0.51	1.2105		-1.3125	0.856		-0.3	0.7656		0.58	0.7656		-0.592	0.7656		-1.54	0.856	ab	0.002	0.7656		-1.262	0.7656		-1.846	0.7656		-1.868	0.7656	b	-2.15	0.7656	b *
				Ctr	0	0.8832		1.0275	0.7649		-1.135	0.7649		0.34	0.7649		0.5467	0.8832		-0.945	0.7649		-0.1375	0.7649		-1.5	0.7649	a	-1.018	0.6841		-1.0525	0.7649		0	0.6841		0.968	0.6841		1.342	0.6841	a	1.5775	0.7649	a	2.656	0.6841	a *
		IL12b	+	LR	-0.0033	0.8832		0.8733	0.8832		-1.07	1.5298		0.1625	0.7649		-0.305	1.0817		-0.3033	0.8832		-0.05	0.7649		1.0625	0.7649	b	0.24	0.8832		0.965	0.7649		0	0.7649		-0.505	0.7649		-1.02	0.7649	b	-1.385	0.7649	b	-1.4275	0.7649	b
				HR	0.0025	0.7649		-0.55	0.7649		-0.2267	0.8832		-1.52	0.7649		0.06	1.0817		0.0625	0.7649		0.22	0.6841		0.66	0.6841	b	0.188	0.6841		0.91	0.7649		0.002	0.6841		-0.782	0.6841		-0.526	0.6841	ab	-1.768	0.6841	b	-1.37	0.6841	b
	Lymphocytes			Ctr	0	0.8344		-0.5375	0.7226	a	0.346	0.6463		0.128	0.6463		-0.2725	0.7226	a	0.4	0.7226		-1.115	0.7226		-0.11	0.7226		-0.224	0.6463		0.584	0.6463		0	0.6463		0.728	0.6463		0.902	0.6463		1.1775	0.7226	a	1.356	0.6463	a
	related	CD3d	+	LR	0	0.8344		1.79	0.8344	b	1.02	1.4452		0.8425	0.7226		2.52	1.0219	b	0.7533	0.8344		-0.01	0.7226		1.6525	0.7226		1.41	0.8344		1.105	0.7226		0	0.7226		0.045	0.7226		-0.17	0.7226		-0.96	0.7226	b	-0.6275	0.7226	b
	genes			HR	0	0.7226		0.025	0.7226	ab	-0.1433	0.8344		0.2625	0.7226		0.085	1.0219	ab	0.1175	0.7226		-0.136	0.6463		0.744	0.6463		0.592	0.6463		0.08	0.7226		0.002	0.6463		0.218	0.6463		-0.226	0.6463		-0.628	0.6463	ab	-0.95	0.6463	b
				Ctr	0	0.78		-0.6133	0.78	a	0.766	0.6042		0.576	0.6042		-0.2325	0.6755		0.865	0.6755		-0.095	0.6755		0.715	0.6755		0.084	0.6042		0.65	0.6042		0	0.6042		0.824	0.6042		1.204	0.6042		1.25	0.6755		1.382	0.6042	a
		CD4	++	LR	0.0033	0.78		3.0533	0.78	b *	0.77	1.351		0.3775	0.6755		1.415	0.9553		0.2433	0.78		-0.825	0.6755		1.7725	0.6755		0.7267	0.78		0.7	0.6755		0	0.6755		0.095	0.6755		0.13	0.6755		-0.11	0.6755		-0.1525	0.6755	ab
				HR	-0.0025	0.6755		0.9625	0.6755	a	0.3067	0.78		-0.6725	0.6755		0.16	0.9553		0.835	0.6755		0.336	0.6042		1.158	0.6042		0.404	0.6042		0.0575	0.6755		0.002	0.6042		0.138	0.6042		0.154	0.6042		-0.508	0.6042		-0.51	0.6042	b *
				Ctr	0	0.799		-0.2475	0.692		-0.53	0.692		0.054	0.6189		-0.3025	0.692		-0.815	0.692		-1.9275	0.692		-1.0875	0.692	a	-1.386	0.6189	a	-0.1	0.6189		0.002	0.6189		0.766	0.6189		0.714	0.6189		0.29	0.692		0.888	0.6189	a
		CD8b	+	LR	0.0033	0.799		1.48	0.799		1.32	1.3839		0.92	0.692		2.055	0.9786		-0.11	0.799		-0.3975	0.692		1.135	0.692	b	1.1633	0.799	b	1.6625	0.692		0.0025	0.692		0.245	0.692		0.205	0.692		-0.535	0.692		-0.4525	0.692	ab
				HR	0.0025	0.692		-0.4375	0.692		-0.51	0.799		-0.765	0.692		-0.365	0.9786		-0.735	0.692		-0.878	0.6189		0.562	0.6189	ab	0.53	0.6189	b	0.1025	0.692		0.002	0.6189		0.098	0.6189		-0.066	0.6189		-0.688	0.6189		-1.01	0.6189	b
				Ctr	0	1.0762		2.5525	0.761	a	0.76	0.8787		2.586	0.6806	a *	1.7	0.8787		0.3625	0.761		0.4825	0.761		0.9525	0.761		0.644	0.6806		1.142	0.6806		0.002	0.6806		-0.138	0.6806		-0.036	0.6806		0.5025	0.761		0.388	0.6806
		CD19	+	LR	0	0.8787		0.1733	0.8787	b	-1.68	1.522		0.7175	0.761	ab	1.295	1.0762		0.1833	0.8787		-0.34	0.761		1.15	0.761		0.9933	0.8787		1.3275	0.761		0.0025	0.761		0.095	0.761		0.08	0.761		-0.61	0.761		-0.1525	0.761
				HR	0	0.761		0.95	0.761	ab	0.7067	0.8787		0.2	0.761	b	-0.64	1.0762		0.18	0.761		-0.026	0.6806		0.814	0.6806		1.542	0.6806		0.655	0.761		0.002	0.6806		-0.822	0.6806		-0.646	0.6806		-0.608	0.6806		-0.95	0.6806
				Ctr	0	0.7818		-0.15	0.6771	ab	-0.16	0.6056		-0.128	0.6056		0.46	0.6771		-1.3867	0.7818		-1.2875	0.6771		-1.6175	0.6771	a	-1.47	0.6056		-0.724	0.6056		0	0.6056		0.704	0.6056		0.192	0.6056		0.34	0.6771		0.556	0.6056
		CD38	+	LR	-0.0033	0.7818		1.0233	0.7818	a	0.47	1.3542		-0.6875	0.6771		0.17	0.9575		-0.4367	0.7818		-1.05	0.6771		0.2125	0.6771	ab	0.09	0.7818		0.99	0.6771		0.0025	0.6771		1.145	0.6771		0.755	0.6771		-0.485	0.6771		0.4725	0.6771
				HR	0.0025	0.6771		-1.1375	0.6771	b	-0.5433	0.7818		-1.54	0.6771		-0.015	0.9575		-0.335	0.6771		-0.038	0.6056		0.442	0.6056	b	-0.15	0.6056		0.4275	0.6771		0.002	0.6056		-0.422	0.6056		-0.066	0.6056		-0.748	0.6056		-0.65	0.6056
				Ctr	0.0003	0.7471		0.8785	0.647		0.7215	0.647		0.3997	0.647		1.7015	0.647	a	1.5533	0.647	a	0.8633	0.647	a	0.8082	0.647		1.0383	0.647		0.858	0.647		0	0.5787		-0.0478	0.5787		-0.3464	0.5787		-0.3797	0.7471		0.5136	0.5787
		CD126	+	LR	-0.0003	0.7471		0.8933	0.7471		-1.12	1.294		-0.9283	0.647		-0.54	0.915	b	-0.7043	0.7471	b	-1.1043	0.7471	b	0.3968	0.647		0.7423	0.7471		0.0742	0.647		0	0.647		0.24	0.647		-0.09	0.647		-0.355	0.647		-0.28	0.647
				HR	-0.0003	0.7471		0.2683	0.647		-0.219	0.7471		-0.646	0.647		0.6515	0.915	ab	0.239	0.647	ab	0.8472	0.5787	a	1.2512	0.5787		1.0972	0.647		0.5177	0.7471		0	0.647		0.055	0.5787		-0.125	0.5787		-0.149	0.5787		-0.665	0.5787
				Ctr	0	0.8658		0.0125	0.7498		0.63	0.6706		1.478	0.6706	a	0.9175	0.7498		0.34	0.7498		0.61	0.7498		1.045	0.7498		0.496	0.6706		0.616	0.6706		0	0.6706		-0.192	0.6706		-0.098	0.6706		-0.7225	0.7498		-0.204	0.6706
		CCR6	+	LR	0	0.8658		0.8267	0.8658		0.38	1.4996		-0.1475	0.7498	ab	-0.375	1.0604		1.01	0.8658		0.065	0.7498		1.47	0.7498		0	0.8658		-0.3525	0.7498		0.0025	0.7498		0.32	0.7498		-0.245	0.7498		0.265	0.7498		0.3475	0.7498
				HR	0.0025	0.7498		0.4	0.7498		0.5233	0.8658		-0.7825	0.7498	b	-0.015	1.0604		-0.125	0.7498		0.81	0.6706		0.67	0.6706		-0.062	0.6706		-0.215	0.7498		0.002	0.6706		0.738	0.6706		0.414	0.6706		0.472	0.6706		0.25	0.6706
				Ctr	0	0.9539		-0.4573	0.7788	ab	1.36	0.7788	a	-0.2885	0.6745	ab	0.9267	0.7788	ab	-0.185	0.6745	a	1.2933	0.7788	a	0.02	0.6745		0.104	0.6033	a	1.0447	0.6745	ab	0	0.6745		-0.428	0.6745		0.787	0.6033		-0.5573	0.7788		-0.033	0.6033	ab
		IFNg	+	LR	0.0003	0.7788		0.86	0.7788	a	NN			1.5377	0.7788	a	2.41	0.9539	a	2.6865	0.9539	b *	0.7332	0.6745	a	1.8882	0.6745		2.1082	0.6745	b *	2.2997	0.6745	a *	0	0.6745		0.84	0.6745		0.96	0.6745		0.295	0.6745		1.6267	0.7788	a
				HR	-0.0003	0.7788		-1.7767	0.6745	b	-2.1457	0.7788	b	-1.3417	0.6745	b	-0.705	0.9539	b	-0.4318	0.6745	a	-1.4228	0.6033	b	0.3612	0.6033		0.1475	0.6745	a	-0.764	0.6745	b	0	0.6033		0.684	0.6033		0.864	0.6033		-0.1	0.6033		-0.496	0.6033	b
				Ctr	-0.0003	1.0823		0.207	1.0823		1.2757	1.0823	a	2.251	1.0823	a	2.1435	0.9373	a	1.4868	0.9373	a	0.7757	1.0823	a	0.6223	1.0823		0.7508	0.8384		-0.5727	1.0823		0.0003	0.9373		0.2235	0.9373		0.0068	0.9373		-0.491	1.0823		0.7334	0.8384
		IL10	++	LR	0	1.3256		-1.6287	1.0823		-0.22	1.8747	ab	-2.734	0.9373	b	-0.14	1.3256	ab	-0.5567	1.0823	ab	-2.364	0.9373	b	-0.709	0.9373		-0.1053	1.0823		-4.096	1.0823	*	0	0.9373		-0.11	0.9373		-0.84	0.9373		-1.68	0.9373		-0.805	0.9373
				HR	0	0.9373		-0.385	0.9373		-2.1733	1.0823	b	-2.5312	0.9373	b	-1.38	1.3256	b	-1.1462	0.9373	b	-0.081	0.8384	ab	0.703	0.8384		-0.539	1.0823		-2.2832	0.9373		0	0.8384		-0.976	0.8384		-1.236	0.8384		-1.32	0.8384		-1.496	0.8384
	1SC = Somatic cells out of milk
	2TW = Treatment week
	3IM = Immunization; routes of administration of vaccines: N = nasal, PC = percutaneous, SC = subcutaneous, IC = intracutaneous, iFA = incomplete Freund's adjuvant
	4LSM = Least square mean
	5Ctr = Control cows (n = 5)
	6LR = Low responder cows (n = 4)
	7HR = High responder cows (n = 5)
	8bMEC = bovine mammary epithelial cells
	9NN = Numerius Negidius; unavailable data
	The plus icon (+) tags the bMEC related genes, which were additionally normalized with the bMEC specific reference gene "KRT8".
	TWs in bold mark in each case the time-point before the first use of the vaccine batches A (TW 1) and B (TW 15).
	Note: IM and milk sampling were performed at the same date, but the milk samples were collected before the vaccination was carried out.
	Grey background: Highlighting of IM, TW and the belonging DDCq data related to the first uses of vaccine batches A or B, respectively.
	An Asterisk (*) indicates significant changes (P<0.05) within a group relating to TW 1 in the time period until and including TW 13, and relating to TW 15 in the remaining treatment period.
	Lower case letters label significant changes (P<0.05) between groups to the same time point.
[truncated: 12 more columns]
